# Supplementary material for: Metabolic molecular subtyping of ovarian cancer reveals the role of oleic acid-CD36 in facilitating cisplatin resistance
Source: Research Square preprint supplement (doi:10.21203/rs.3.rs-7929093/v1), 2025-11-14
Supplement: Supplementary file 1 [file 3636a48204e29dcb1011ca53.docx]

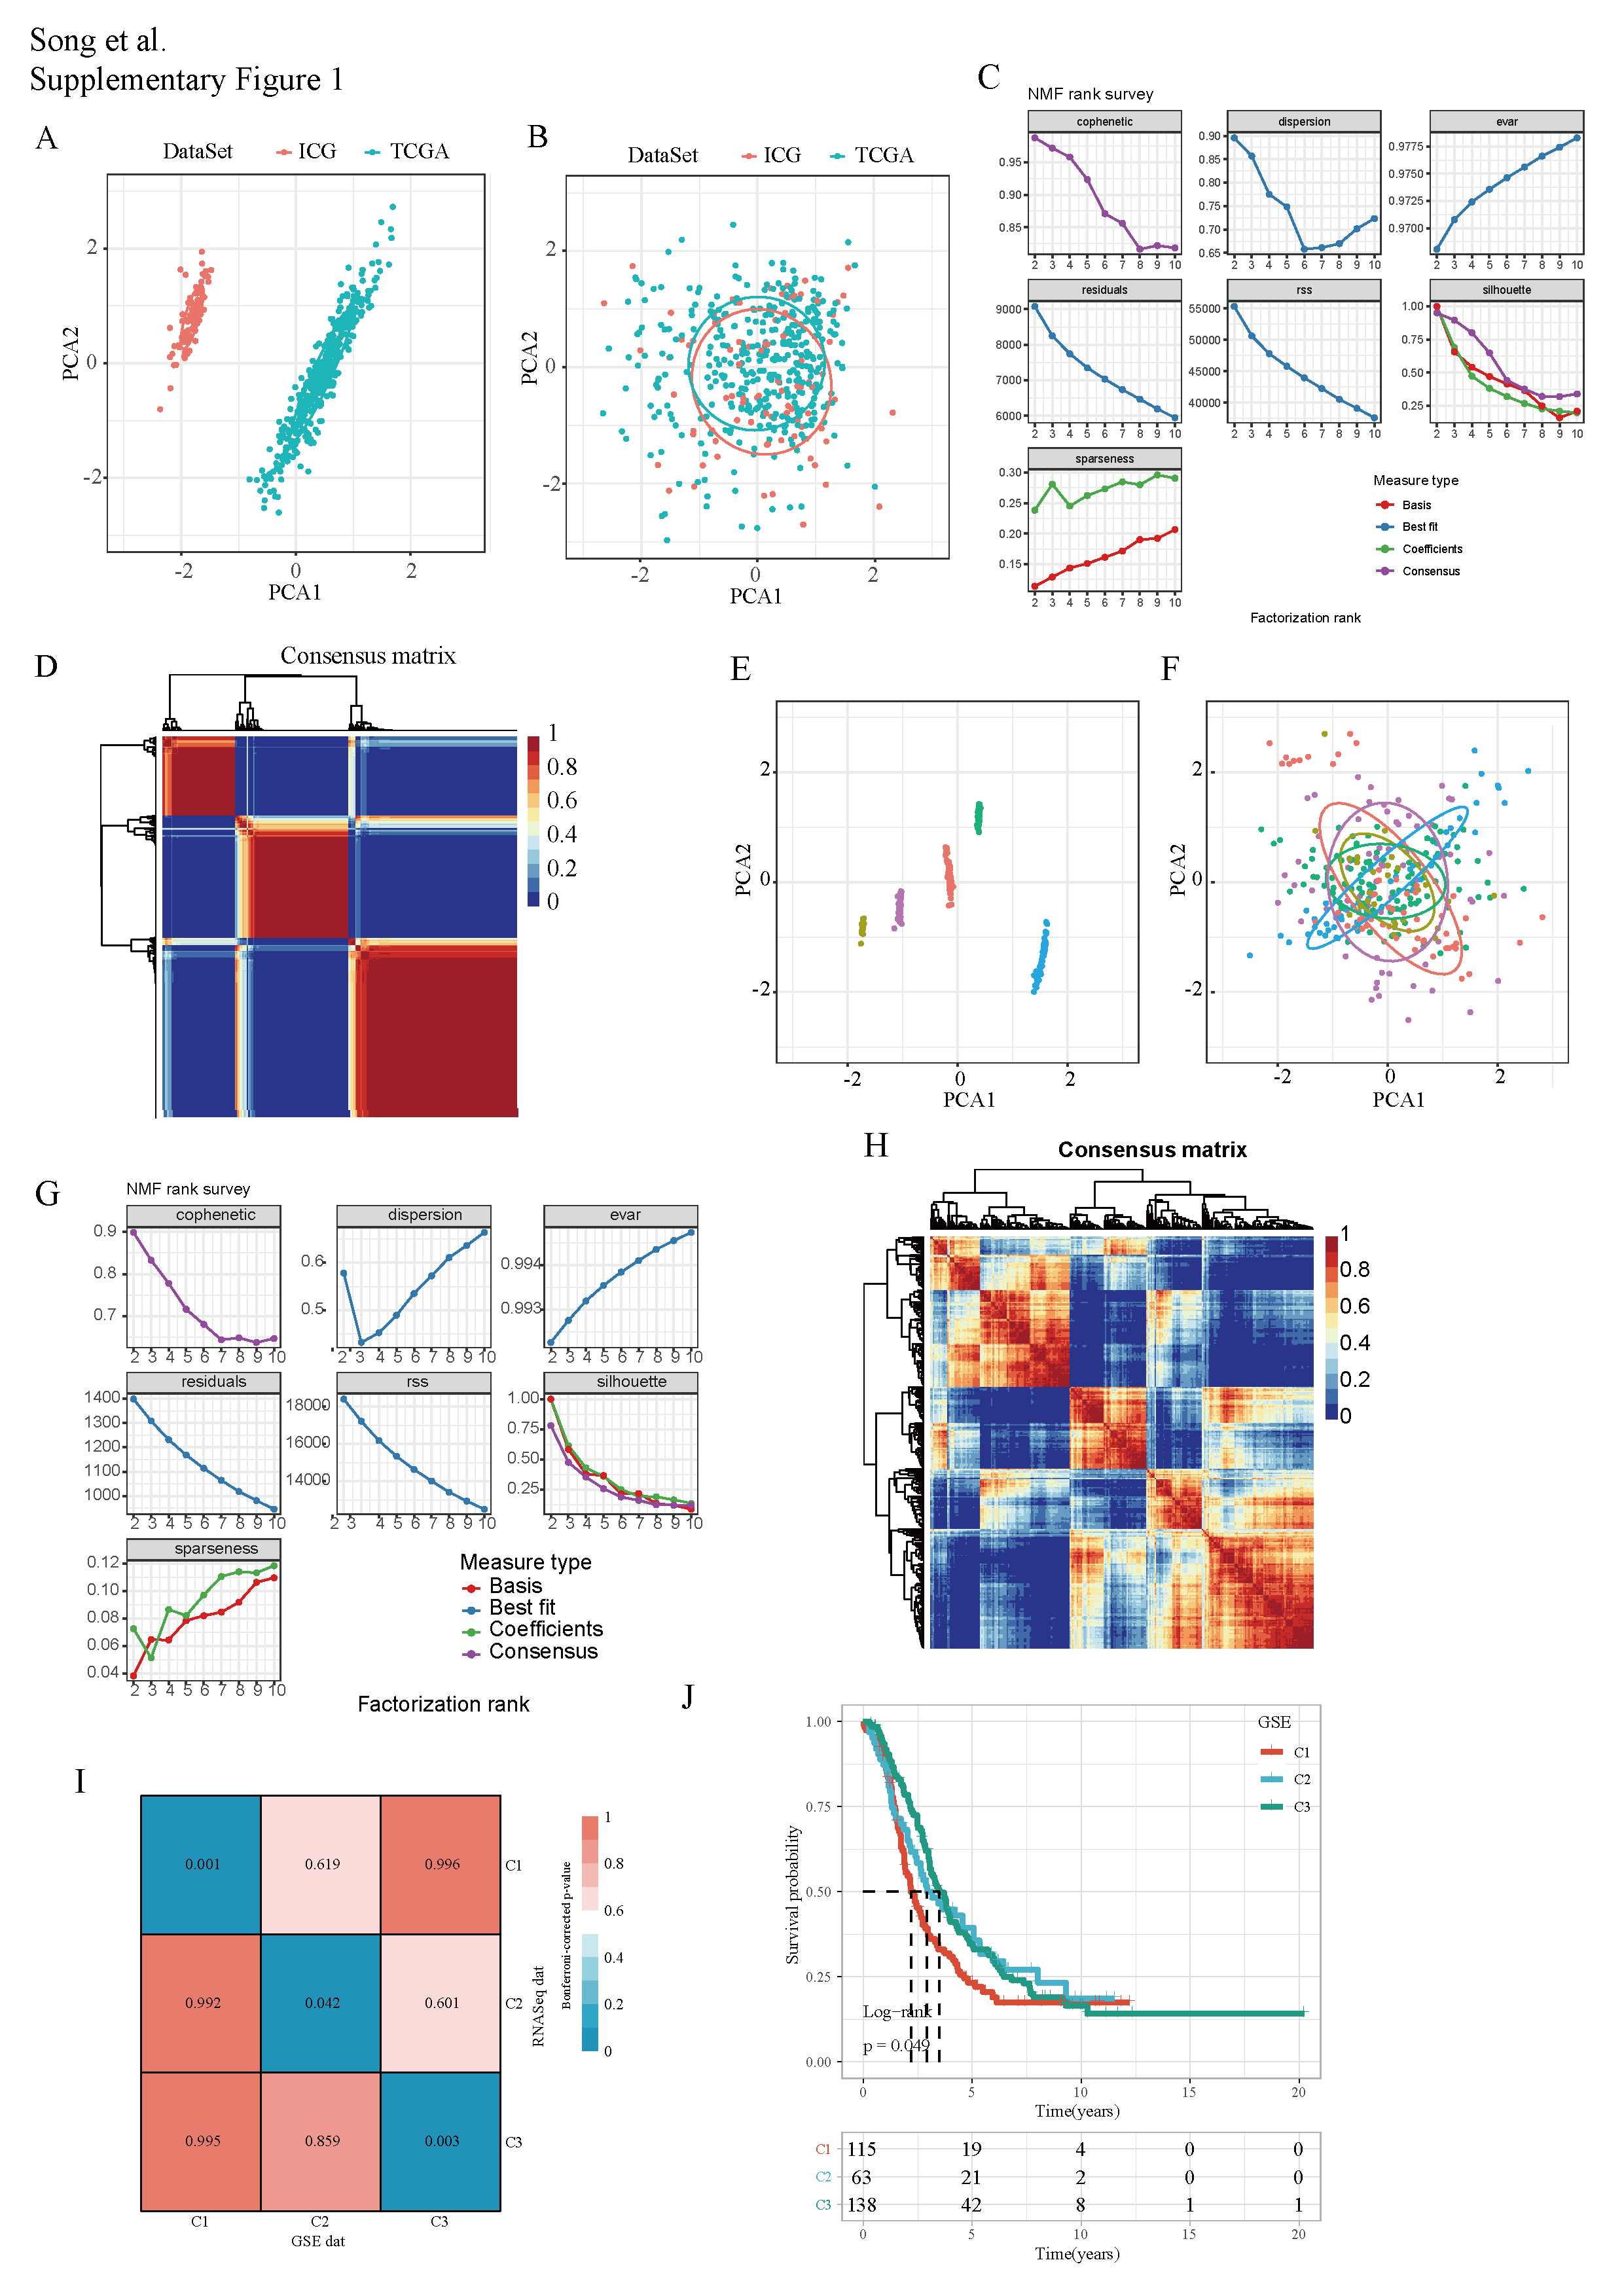


**Supplementary Figure 1. NMF method was used to perform molecular typing of the processed data set based on metabolism-related genes. The sample is divided into three subtypes named C1, C2, and C3.**

A. PCA analysis before batch effect elimination of TCGA and ICGC datasets.

B. PCA analysis after batch effect elimination of TCGA and ICGC datasets.

C-D. NMF clustering divided the samples in the RNASeqdat cohort into three subtypes. Rank and cophenetic correlation coefficients after NMF (C). A consensus map of NMF clusters (D).

E. PCA analysis of five GSE datasets before eliminating batch effects.

F. PCA analysis after batch effect elimination in five GSE datasets.

G-H. NMF clustering divided the samples in the GSEdat cohort into three subtypes. Rank and cophenetic correlation coefficients after NMF (G). A consensus map of NMF clusters (H).

I. The SubMap method is used to analyze whether subclasses identified in the RNASeqdat and GSEdat datasets are related

J. Overall survival curves showing the prognosis result of the three subtypes (C1, C2 and C3) obtained from NMF clustering in the GSEdat cohort. Statistical significance was calculated using the log rank test.


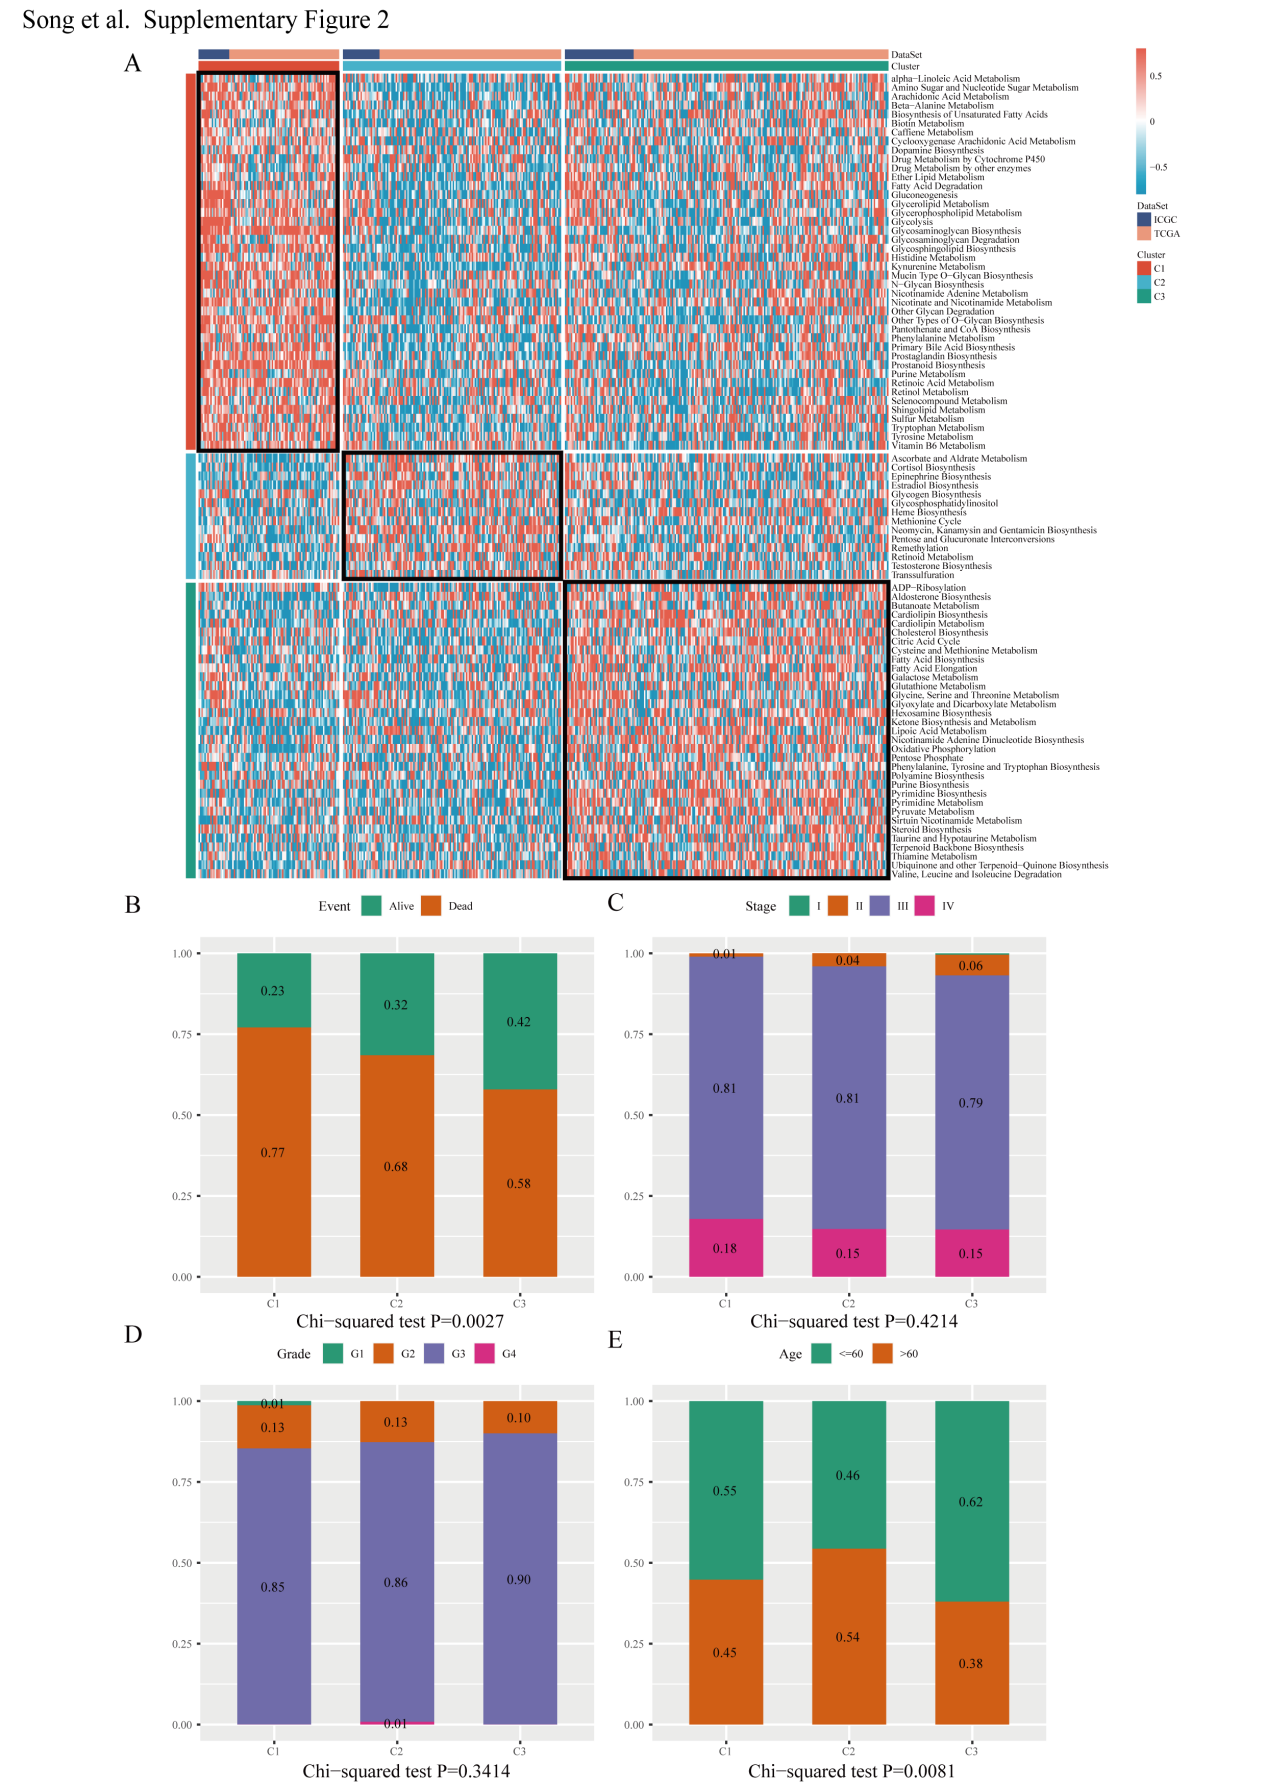


**Supplementary Figure 2. The distribution of survival state, age, grade and stage among different molecular subtypes in RNASeqdat dataset was compared.**

1. Heat map showing ssGSEA scores of metabolic processes of different molecular subtypes.

B-D. The proportion of event (A) stage (B) and grade (C) in different molecular subtypes.

E. The proportion of age in different molecular subtypes.


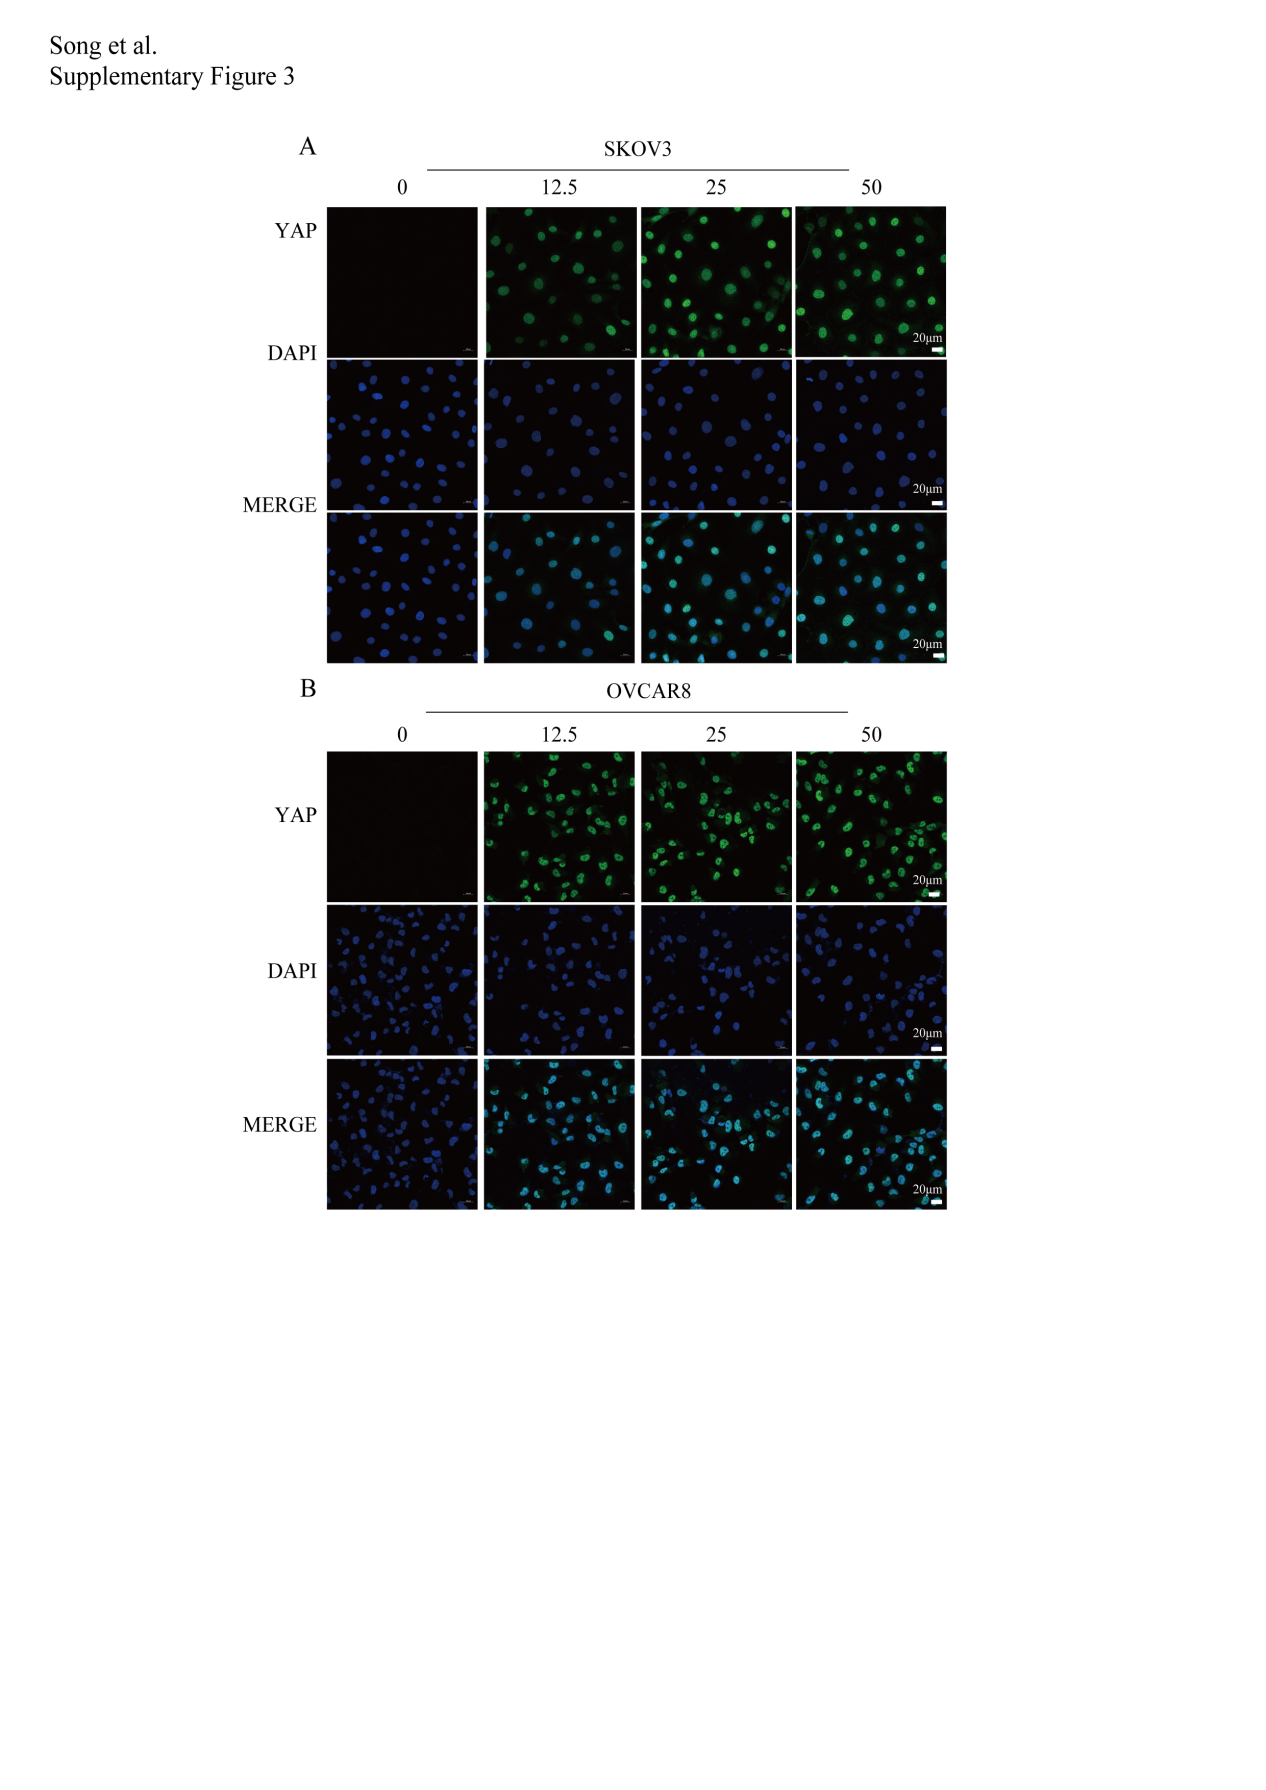


**Supplementary Figure 3. Oleic acid activates and promotes nuclear translocation of YAP in both MCRT and MCST metabolic subtypes of ovarian cancer cell lines.**

A-B. SKOV3 (A) or OVCAR8 (B) cells were treated with increasing amount of oleic acid for 48 hours separately, and subjected to immunostaining with anti-YAP rabbit (green), followed by visualization with confocal microscopy (Zeiss LSM 880 with Airyscan). Scale bar, 20 μm (3 independent experiments; at least 50 cells were observed).


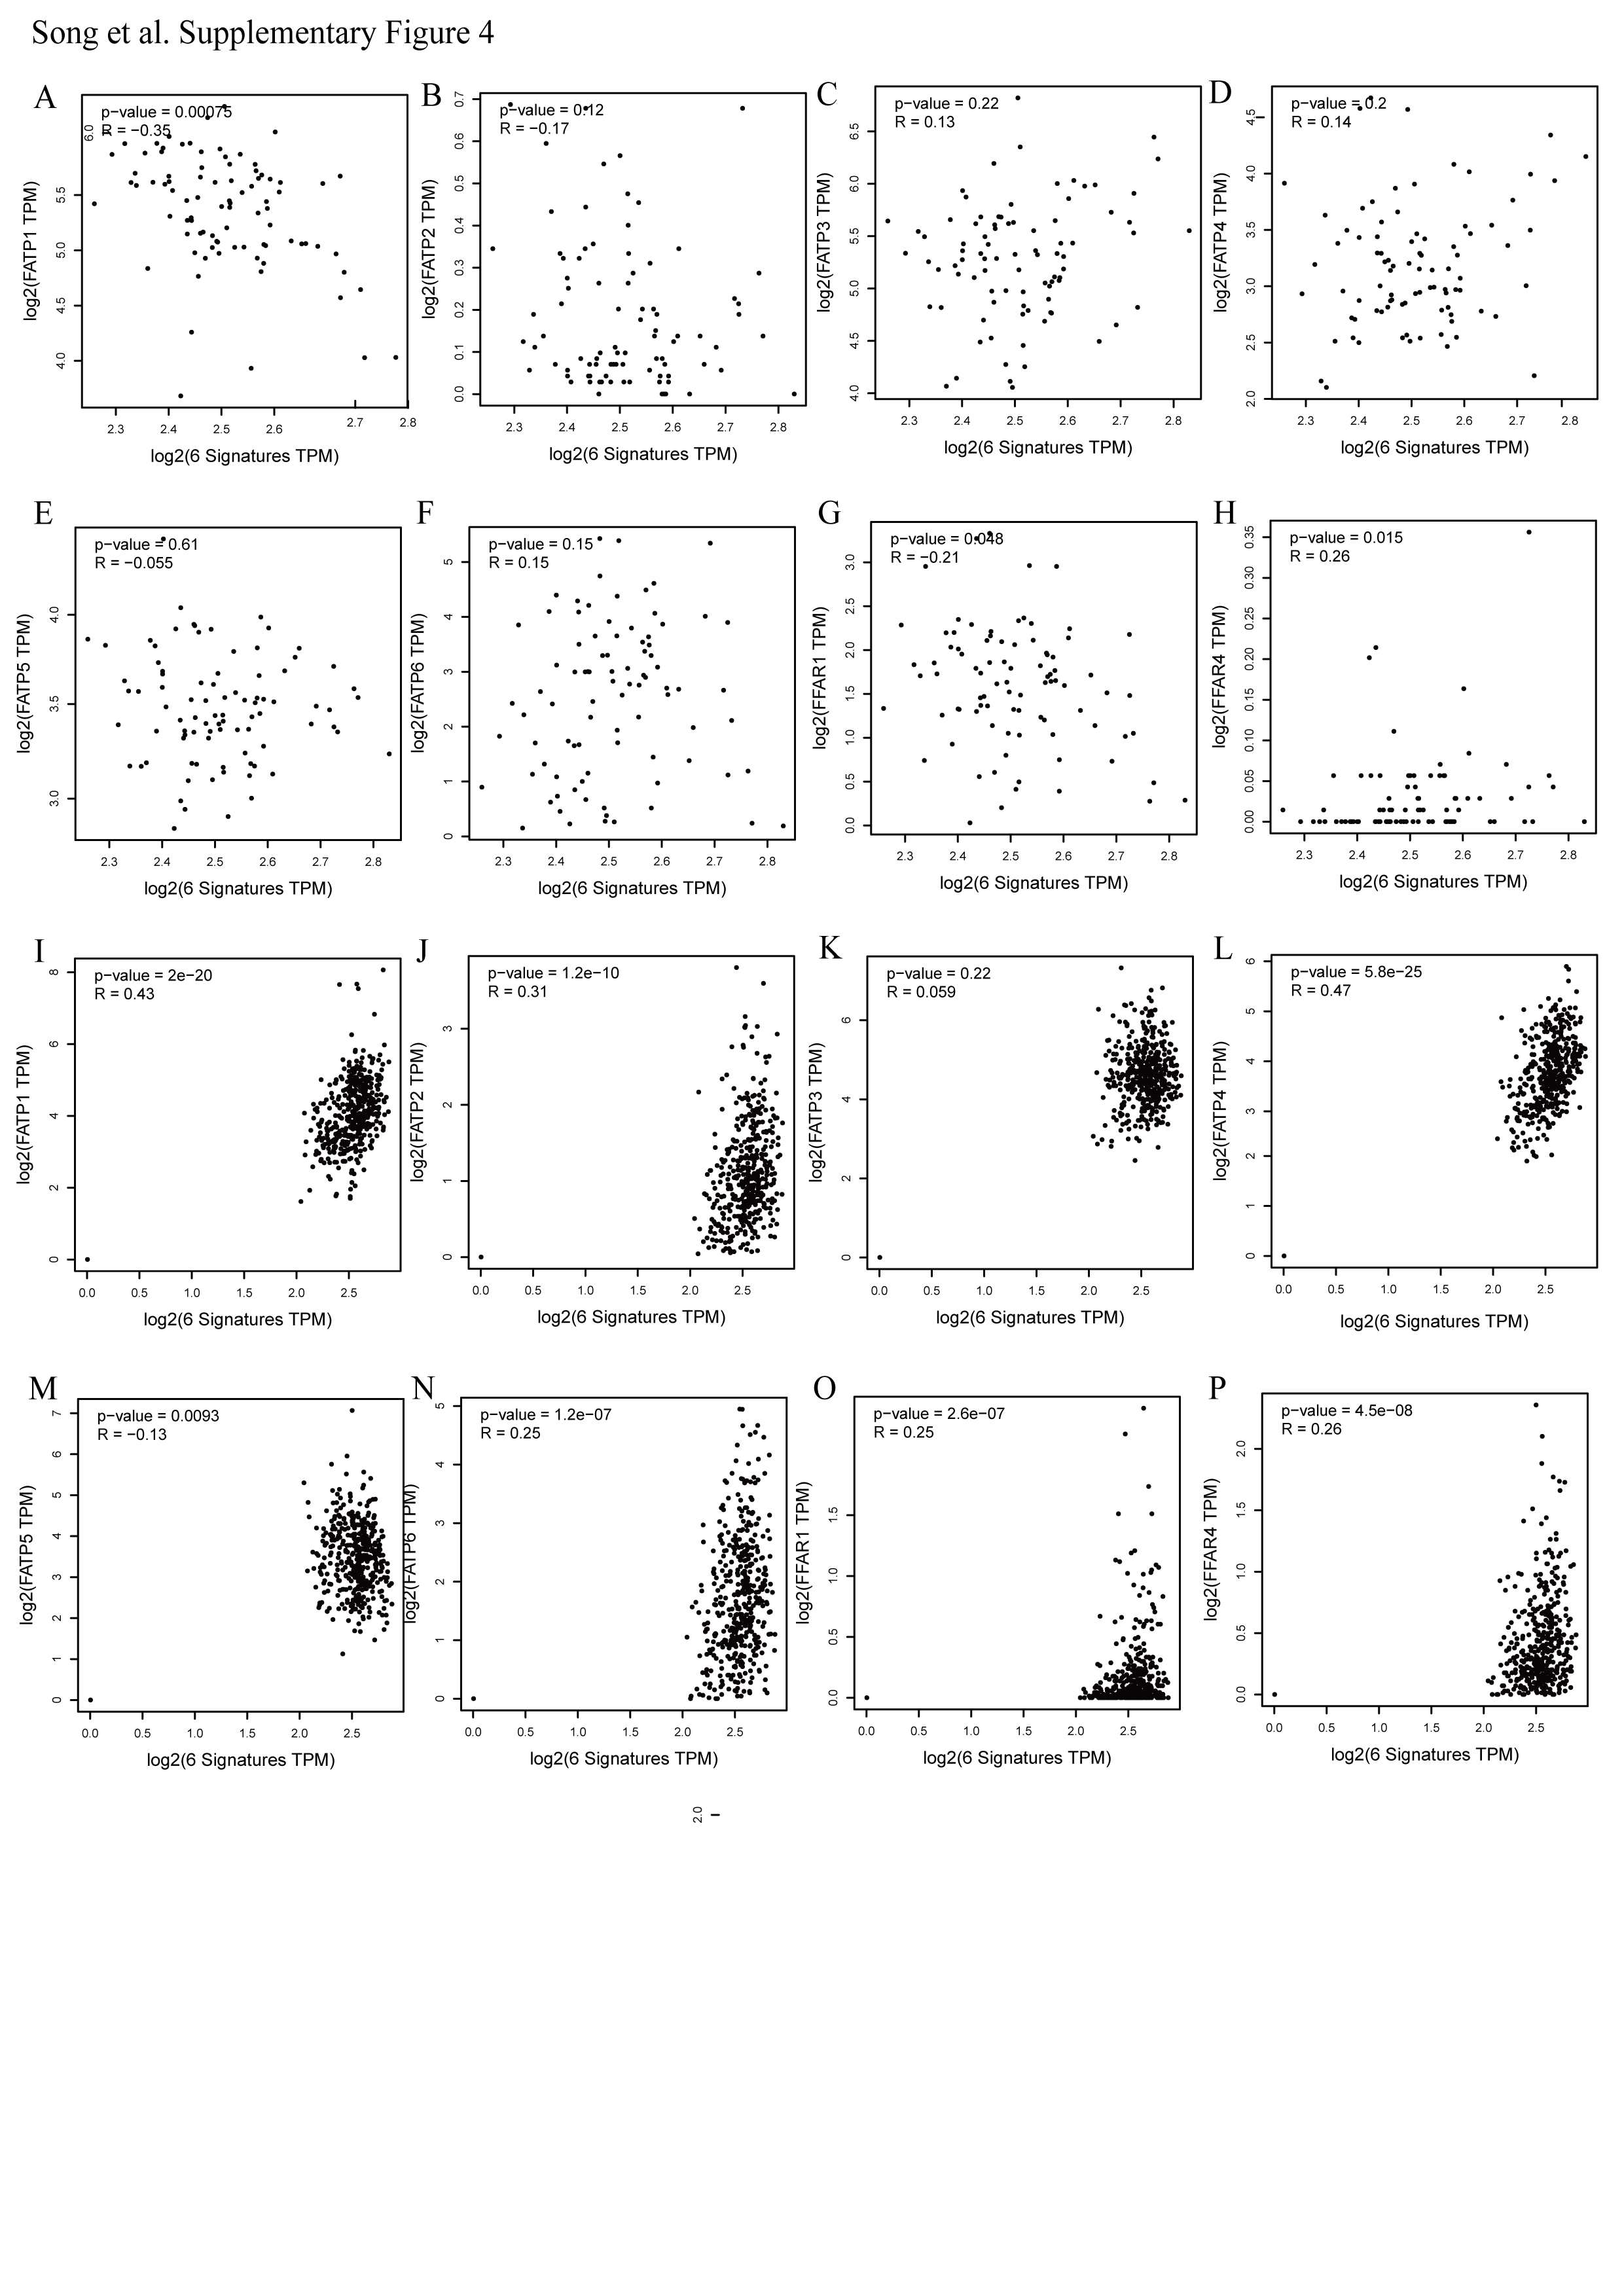


**Supplementary Figure 4.**

1. H. The Spearman correlation between YAP signatures (YAP1, TEAD1-4, and CYR61) and FATP1 (A), FATP2 (B), FATP3 (C), FATP4 (D), FATP5 (E), FATP6 (F), FFAR1 (G), FFAR4 (H) were analyzed in GTEx ovary tissues.

I-P. The Spearman correlation between YAP signatures (YAP1, TEAD1-4, and CYR61) and FATP1 (I), FATP2 (J), FATP3 (K), FATP4 (L), FATP5 (M), FATP6 (N), FFAR1 (O), FFAR4 (P) were analyzed in TCGA patients with ovarian cancer.


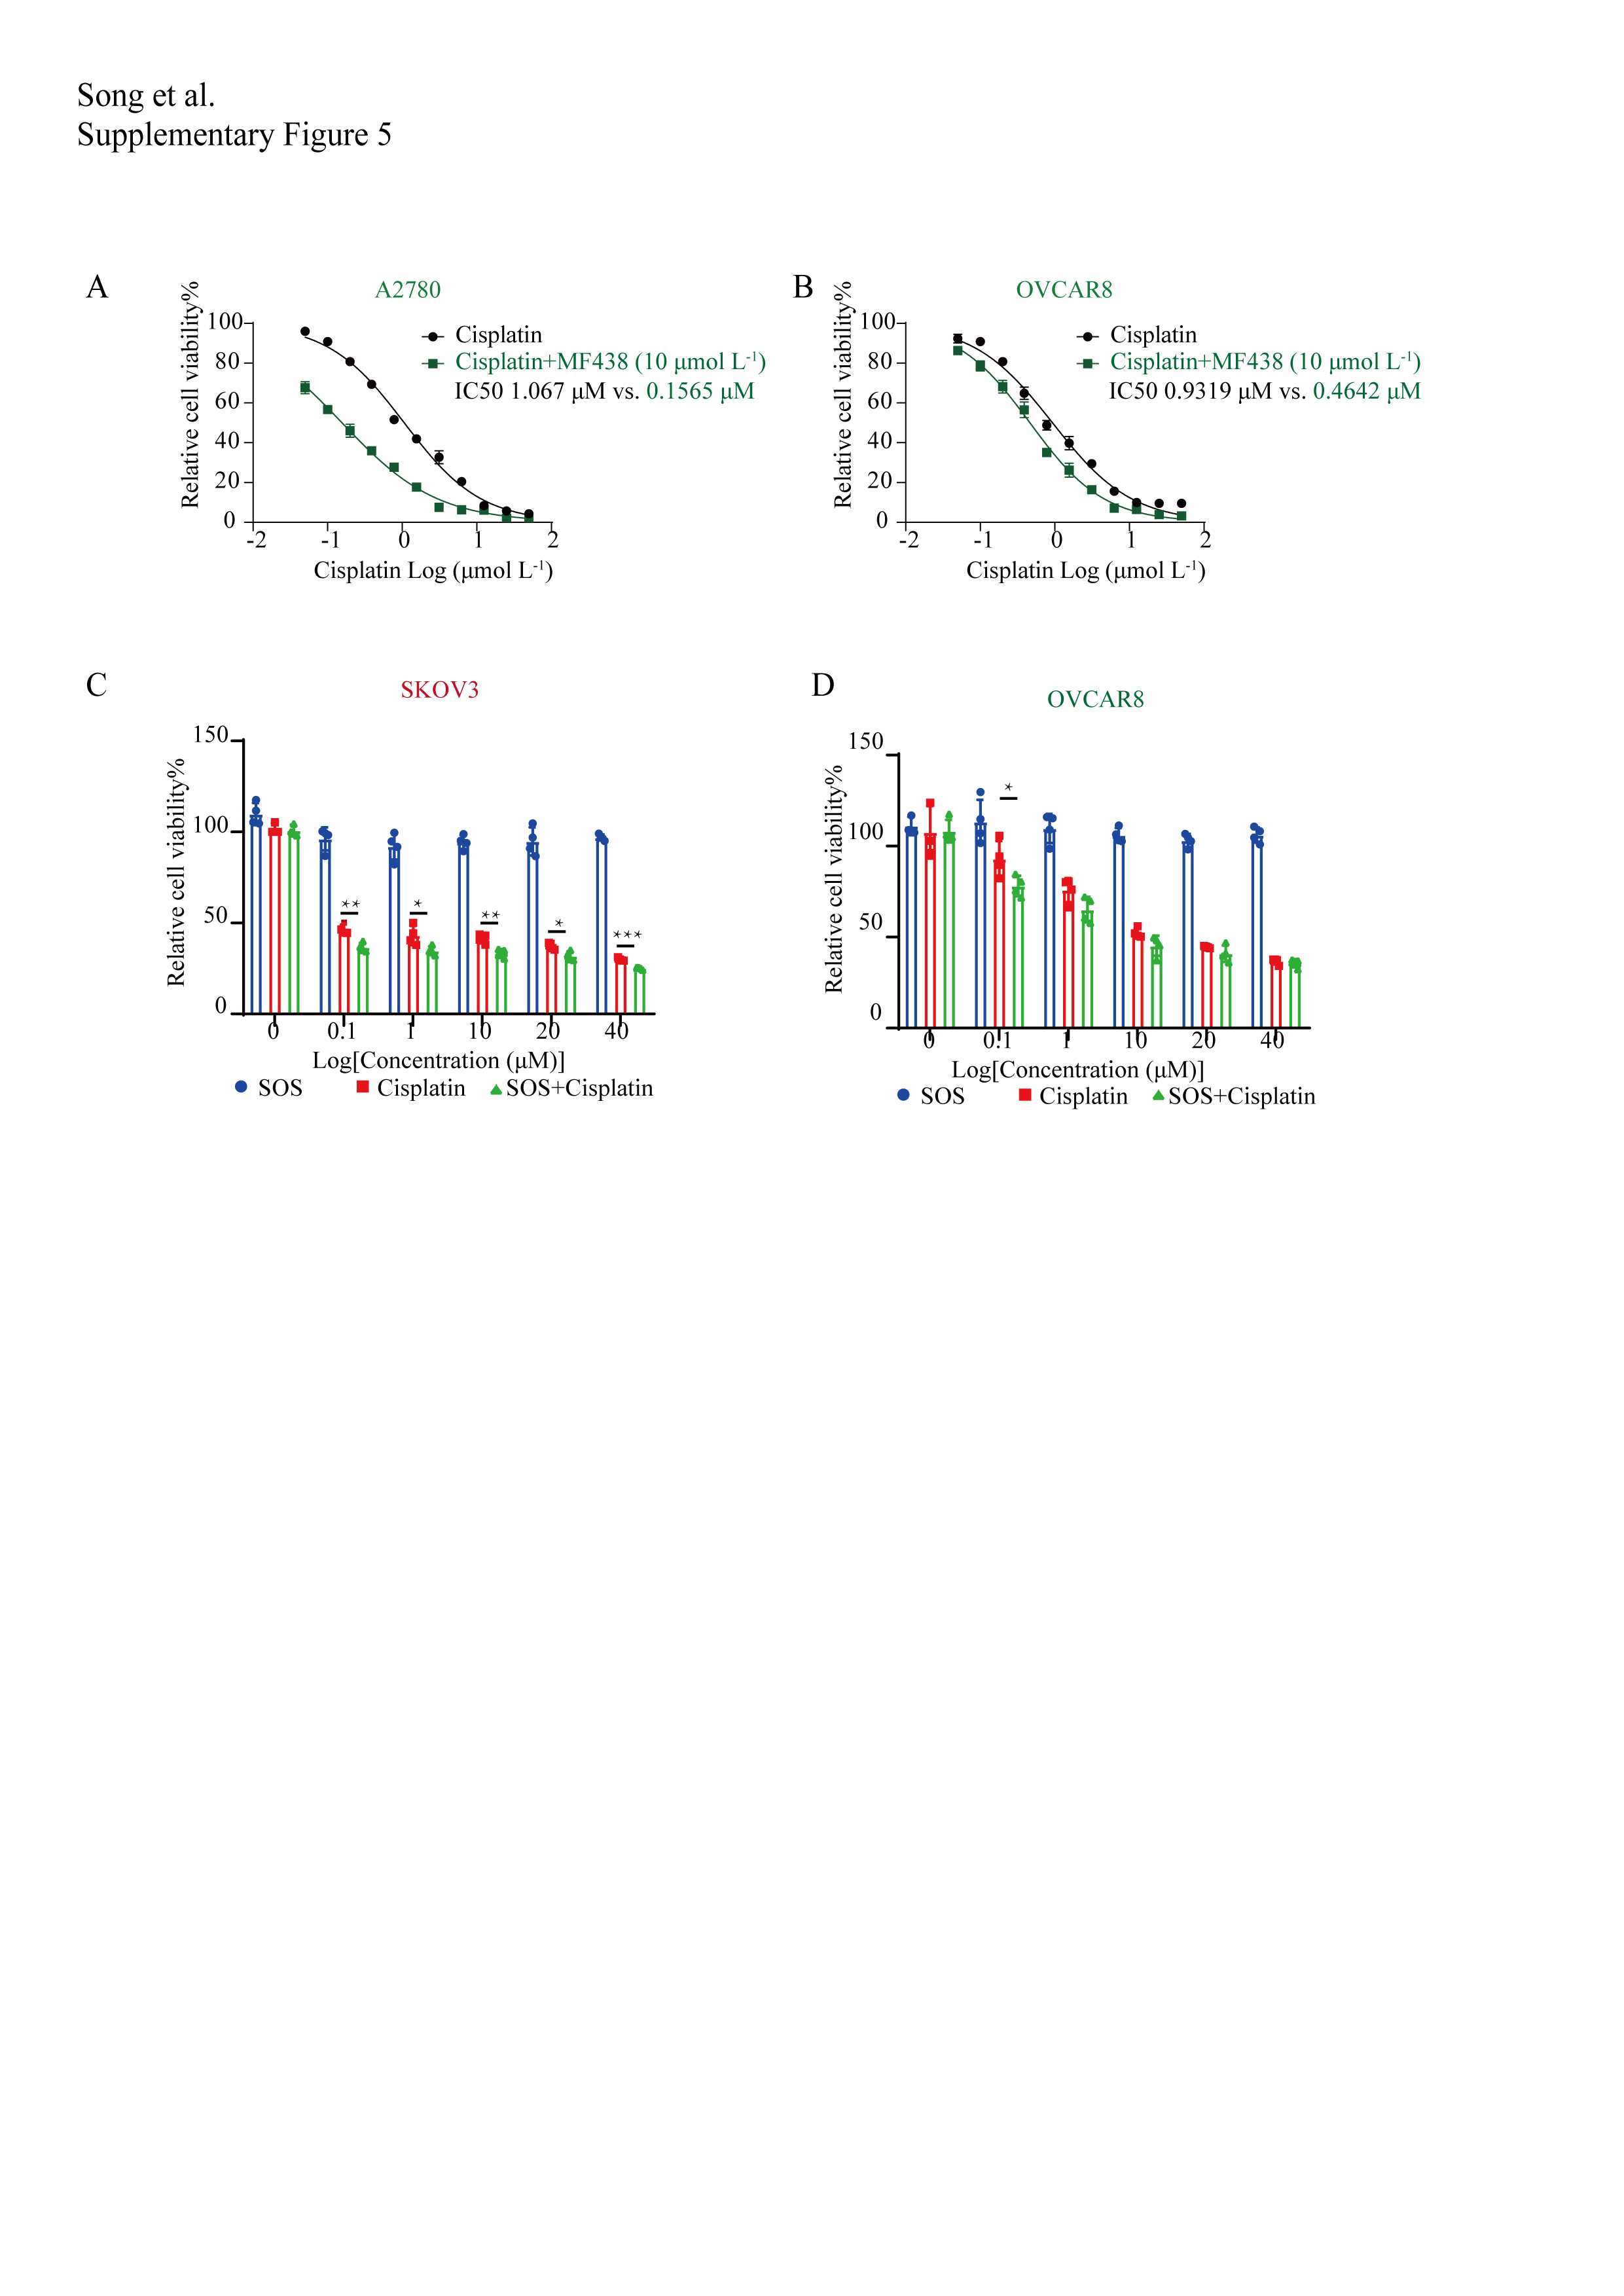


**Supplementary Figure 5.** **Inhibition of SCD1 or CD36 enhances the sensitivity of cisplatin in ovarian cancer cells.**

A-B. Viability of ovarian cancer cell lines A2780 (A), and OVCAR8 (B) was assessed after treatment with cisplatin or cisplatin plus MF438 for 72 hours using the CCK8 assay (3 independent experiments). Data are presented as mean ± SEM. **p* < 0.05, ***p* < 0.01, ****p* < 0.001 by Student’s t-test.

C-D. Viability of ovarian cancer cell lines SKOV3 (C), and OVCAR8 (D) was assessed after treatment with SOS, cisplatin or cisplatin plus SOS for 72 hours using the CCK8 assay (3 independent experiments). Data are presented as mean ± SEM. **p* < 0.05, ***p* < 0.01, ****p* < 0.001 by Student’s t-test.

**Supplementary Table 1. Clinical information of patients with ovarian cancer (**Targeted lipid metabolomics detection was performed for patients #5, 7, 8, 10, 11, 17, organoid culture and drug screening experiments were conducted for patients #28, 29, 31, 34, 36, 37, and RNA sequencing was carried out for patients #46–53**).**

| **Number** | **Staging** | **Age** | **BMI** | **[Abdominal](https://cn.bing.com/dict/search?q=Abdominal&FORM=BDVSP6&cc=cn) [water](https://cn.bing.com/dict/search?q=water&FORM=BDVSP6&cc=cn)（mL）** | **Cisplatin resistance** |
| --- | --- | --- | --- | --- | --- |
| **5** | **IIIC** | **70** | **20.4** | **3077** | **No** |
| **7** | **IIIC** | **50** | **26.89** | **1542** | **No** |
| **8** | **IIIC** | **58** | **28.96** | **8000** | **Yes** |
| **10** | **IVA** | **51** | **28.9** | **500** | **Yes** |
| **11** | **IVB** | **50** | **21.09** | **407.40** | **Yes** |
| **17** | **IIIC** | **70** | **18.67** | **19879** | **No** |
| **28** | **IV** | **66** | **28.69** | **2301.00** | **Yes** |
| **29** | **IIIC** | **46** | **22.58** | **2777.00** | **No** |
| **31** | **IVB** | **56** | **24.16** | **683.30** | **Yes** |
| **34** | **IVB** | **62** | **25.39** | **3817.00** | **Yes** |
| **36** | **IIIC** | **41** | **24.55** | **597.20** | **No** |
| **37** | **IIIC** | **45** | **21.87** | **1483.00** | **No** |
| **46** | **IIIB** | **51** | **24.00** | **960.00** | **Yes** |
| **47** | **IV** | **49** | **19.98** | **698.50** | **Yes** |
| **48** | **IVB** | **45** | **29.14** | **2139.00** | **Yes** |
| **49** | **IIIC** | **67** | **25.06** | **3201.00** | **Yes** |
| **50** | **IIIC** | **44** | **22.30** | **2896.10** | **No** |
| **51** | **III** | **53** | **24.03** | **520.40** | **No** |
| **52** | **IIIB** | **50** | **22.65** | **3901.00** | **No** |
| **53** | **IV** | **54** | **28.70** | **1638.50** | **No** |
